# Supplementary material for: Potent Antimicrobial and Antibiofilm Activities of Feleucin-K3 Analogs Modified by α-(4-Pentenyl)-Ala against Multidrug-Resistant Bacteria
Source: MDPI journal article supplement (doi:10.3390/biom11050761), 2021-05-19
Supplement: s1 [file s1]

## Supplementary Material

**Table S1.** Circular dichroism spectrum data of Feleucin-K3 and its analogs in PBS and 50% TFE.

| Peptide (% content <sup>a</sup> ) | PBS             | 50%TFE          |
|-----------------------------------|-----------------|-----------------|
|                                   | $\beta$ -strand | $\beta$ -strand |
| Feleucin-K3                       | 1.95            | 0.46            |
| K63                               | 10.51           | 16.41           |
| K64                               | 14.63           | 23.24           |
| K65                               | 11.12           | 23.56           |
| K66                               | 9.71            | 10.93           |
| K67                               | 12.82           | 18.86           |
| K68                               | 12.30           | 17.34           |
| K69                               | 10.28           | 24.08           |
| K70                               | 9.38            | 18.09           |
| K71                               | 20.20           | 21.99           |

<sup>a</sup>The  $\alpha$ -helix and  $\beta$ -strand contents of the Feleucin-K3 analogs were estimated online by K2D3 tools.

## 2. Quality Data for Major Synthetic Peptides Used in This Study

### 2.1. MS and HPLC data for Feleucin-K63

MS: expected mass: 968.3; Measured average mass: 967.7

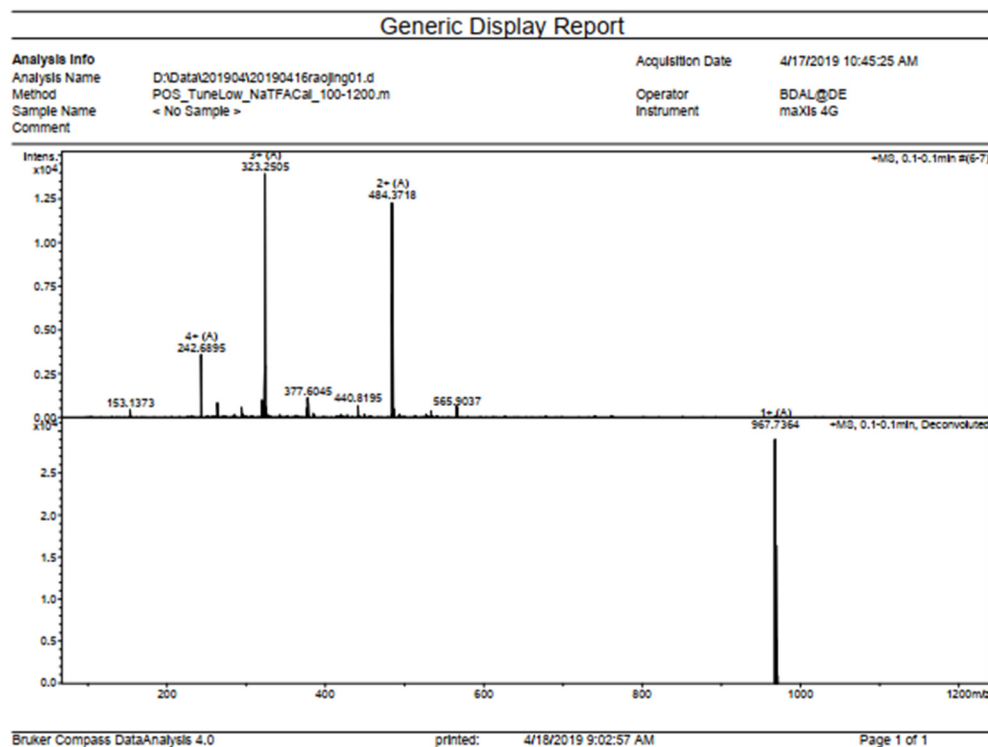

### Customer Peptide HPLC Report

Purity: 96.07%

| Sample Information |              |                     |                        |
|--------------------|--------------|---------------------|------------------------|
| Name:              | K63          | Collector:          | System                 |
| Type:              | NO           | Acquisition time:   | 2019-5-31 10:19:13 CST |
| Bottle number:     | 1            | Method group:       | 0                      |
| Injection times:   | 1            | Processing date:    | 2019-5-31 20:49:18 CST |
| Injection volume:  | 20.00 ul     | Processing method:  | 0                      |
| Operation time:    | 30.0 Minutes | Channel name:       | 220.0 nm               |
|                    |              | Channel annotation: | PDA 220.0 nm           |

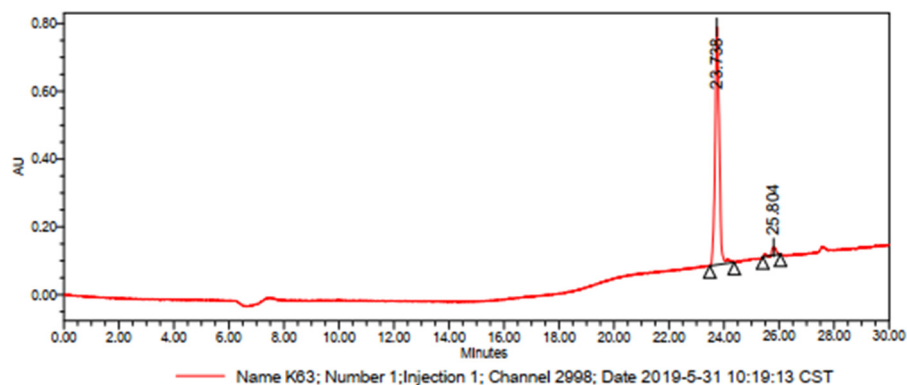

Channel: PDA 220.0 nm

|   | channel      | retention time(min) | area    | % area | peak height |
|---|--------------|---------------------|---------|--------|-------------|
| 1 | PDA 220.0 nm | 23.738              | 7339853 | 96.07  | 700906      |
| 2 | PDA 220.0 nm | 25.804              | 300423  | 3.93   | 23054       |

## 2.2. MS and HPLC data for Feleucin-K64

MS: expected mass: 994.5; Measured average mass: 993.8

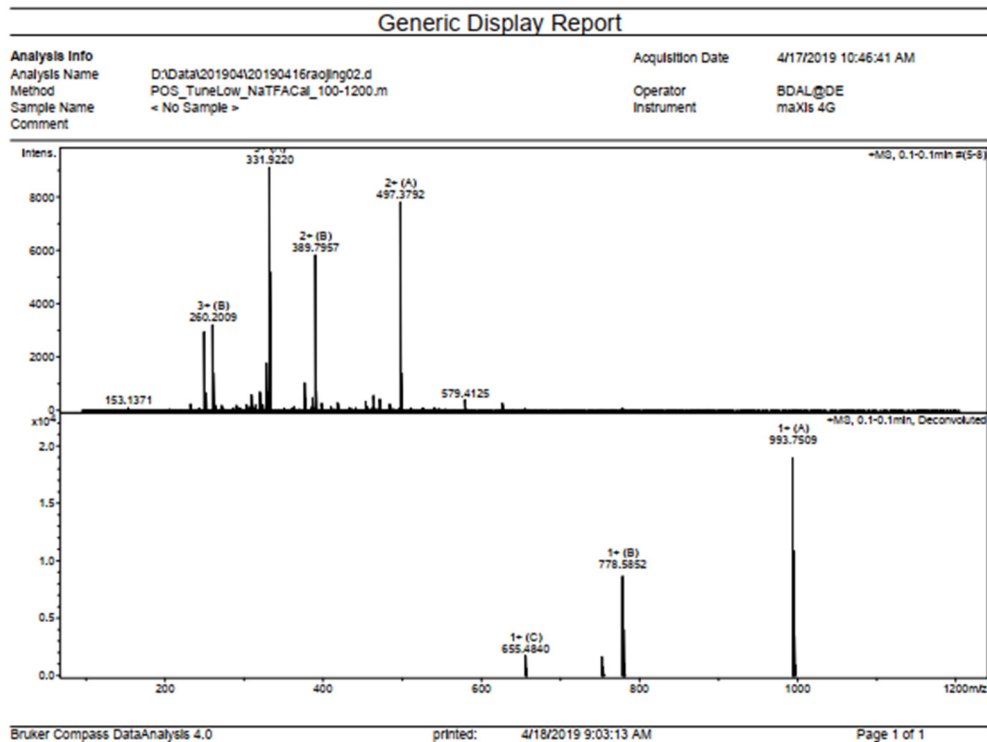

## Customer Peptide HPLC Report

Purity: 100.00%

| Sample Information |              |                     |                        |
|--------------------|--------------|---------------------|------------------------|
| Name:              | K64          | Collector:          | System                 |
| Type:              | NO           | Acquisition time:   | 2019-7-19 17:04:32 CST |
| Bottle number:     | 1            | Method group:       | peptide                |
| Injection times:   | 1            | Processing date:    | 2019-7-19 20:37:23 CST |
| Injection volume:  | 20.00 ul     | Processing method:  | 0                      |
| Operation time:    | 30.0 Minutes | Channel name:       | 220.0 nm               |
|                    |              | Channel annotation: | PDA 220.0 nm           |

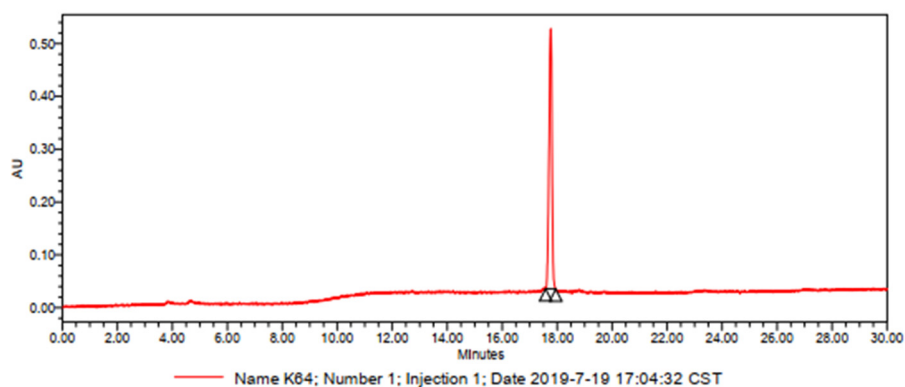

**Channel: PDA 220.0 nm**

|   | channel      | retention time(min) | area    | % area | peak height |
|---|--------------|---------------------|---------|--------|-------------|
| 1 | PDA 220.0 nm | 17.768              | 3728537 | 100.00 | 492610      |

MS: expected mass: 1107.5; Measured average mass: 1106.8

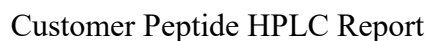

Purity:98.90%

Name: K65  
Type: NO  
Bottle number: 1  
Injection times: 1  
Injection volume: 20.00 ul  
Operation time: 30.0 Minutes

Collector: System  
Acquisition time: 2019-5-31 17:31:58 CST  
Method group: peptide  
Processing date: 2019-5-31 20:58:09 CST  
Processing method: 0  
Channel name: 220.0 nm  
Channel annotation: PDA 220.0 nm

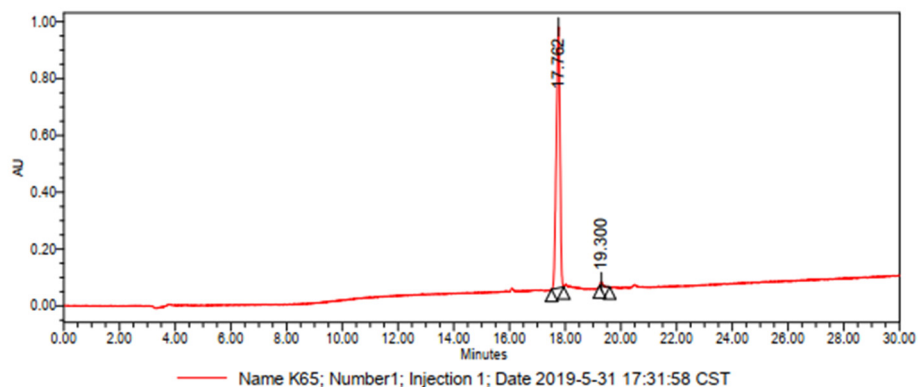

Channel: PDA 220.0 nm

|   | channel      | retention time(min) | area    | % area | peak height |
|---|--------------|---------------------|---------|--------|-------------|
| 1 | PDA 220.0 nm | 17.762              | 8323065 | 98.90  | 918299      |
| 2 | PDA 220.0 nm | 19.300              | 92528   | 1.10   | 15403       |

## 2.4. MS and HPLC data for Feleucin-K66

MS: expected mass: 952.5; Measured average mass: 951.7

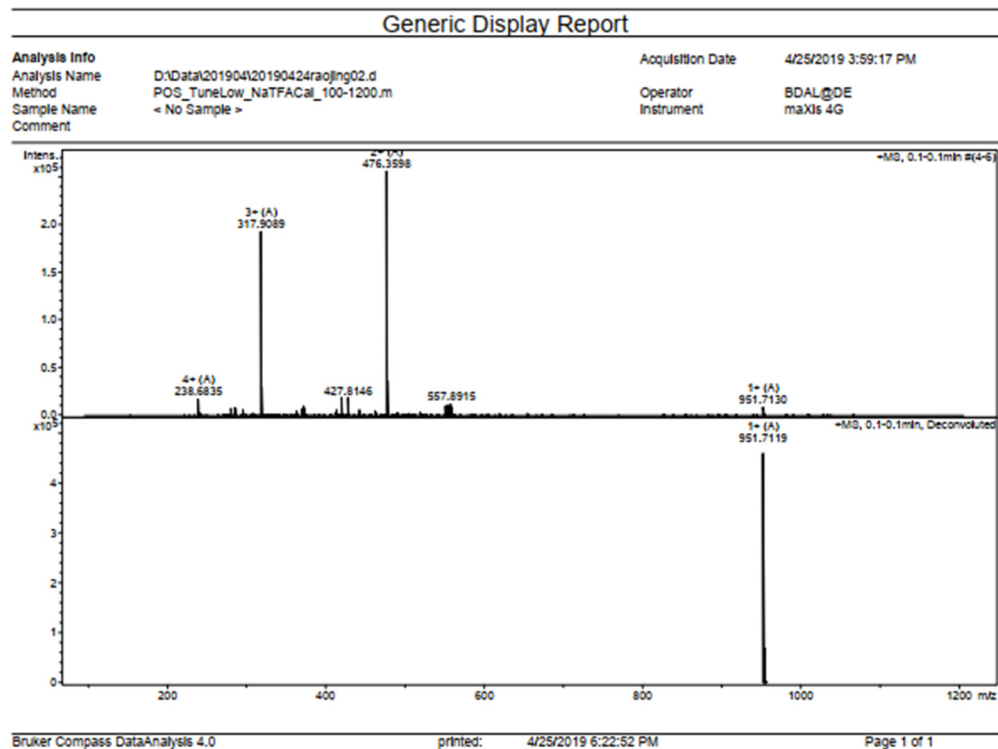

## Customer Peptide HPLC Report

Purity:96.25%

| Sample Information |              |                     |                        |
|--------------------|--------------|---------------------|------------------------|
| Name:              | K66          | Collector:          | System                 |
| Type:              | NO           | Acquisition time:   | 2019-5-31 18:19:48 CST |
| Bottle number:     | 1            | Method group:       | peptide                |
| Injection times:   | 1            | Processing date:    | 2019-5-31 21:01:42 CST |
| Injection volume:  | 20.00 ul     | Processing method:  | 0                      |
| Operation time:    | 30.0 Minutes | Channel name:       | 220.0 nm               |
|                    |              | Channel annotation: | PDA 220.0 nm           |

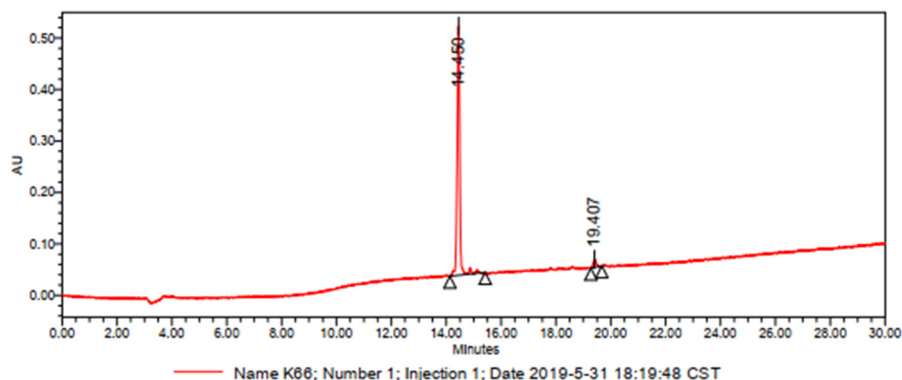

Channel: PDA 220.0 nm

|   | channel      | retention time(min) | area    | % area | peak height |
|---|--------------|---------------------|---------|--------|-------------|
| 1 | PDA 220.0 nm | 14.450              | 3213739 | 96.25  | 483436      |
| 2 | PDA 220.0 nm | 19.407              | 125260  | 3.75   | 15457       |

## 2.5. MS and HPLC data for Feleucin-K67

MS: expected mass: 1141.5; Measured average mass: 1140.8

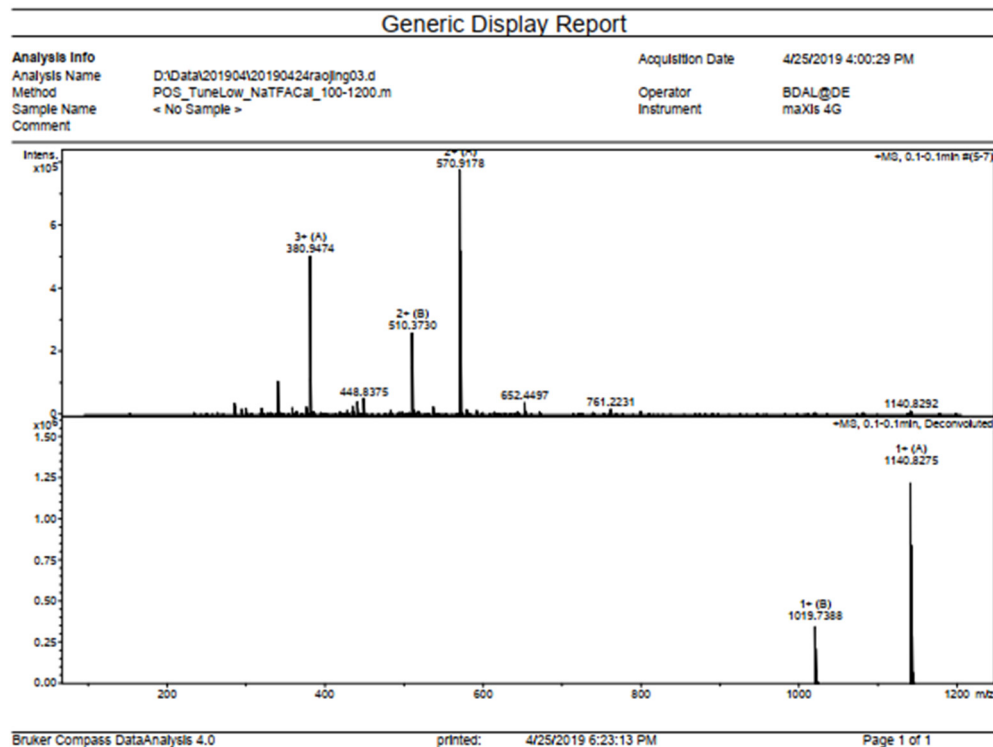

## Customer Peptide HPLC Report

Purity:98.45%

| Sample Information |              |                     |                        |
|--------------------|--------------|---------------------|------------------------|
| Name:              | K67          | Collector:          | System                 |
| Type:              | NO           | Acquisition time:   | 2019-5-31 20:02:52 CST |
| Bottle number:     | 1            | Method group:       | peptide                |
| Injection times:   | 1            | Processing date:    | 2019-5-31 21:03:01 CST |
| Injection volume:  | 20.00 ul     | Processing method:  | 0                      |
| Operation time:    | 30.0 Minutes | Channel name:       | 220.0 nm               |
|                    |              | Channel annotation: | PDA 220.0 nm           |

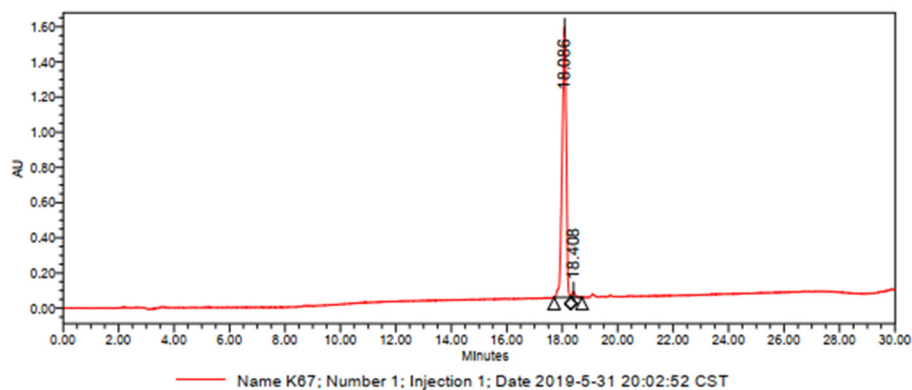

Channel: PDA 220.0 nm

|   | channel      | retention time(min) | area     | % area | peak height |
|---|--------------|---------------------|----------|--------|-------------|
| 1 | PDA 220.0 nm | 18.086              | 15645465 | 98.45  | 1539079     |
| 2 | PDA 220.0 nm | 18.408              | 246630   | 1.55   | 33378       |

## 2.6. MS and HPLC data for Feleucin-K68

MS: expected mass: 1141.5; Measured average mass: 1140.8

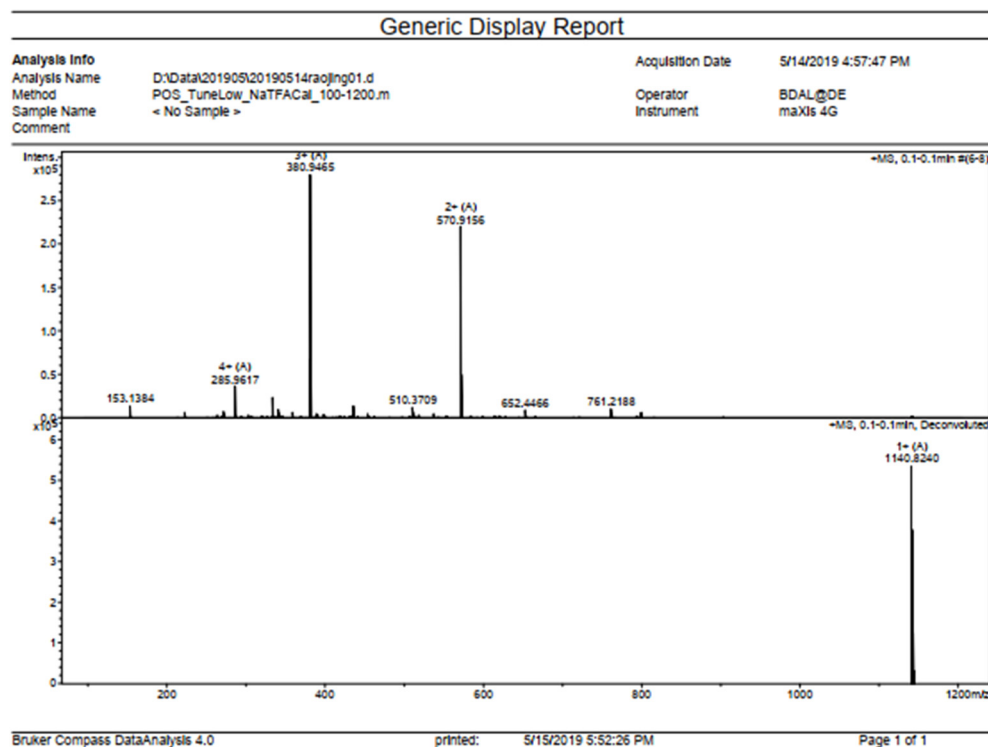

## Customer Peptide HPLC Report

Purity:100.00%

| Sample Information |              |                     |                        |
|--------------------|--------------|---------------------|------------------------|
| Name:              | K68          | Collector:          | System                 |
| Type:              | NO           | Acquisition time:   | 2019-5-31 20:47:18 CST |
| Bottle number:     | 1            | Method group:       | peptide                |
| Injection times:   | 1            | Processing date:    | 2019-5-31 21:18:16 CST |
| Injection volume:  | 20.00 ul     | Processing method:  | 0                      |
| Operation time:    | 30.0 Minutes | Channel name:       | 220.0 nm               |
|                    |              | Channel annotation: | PDA 220.0 nm           |

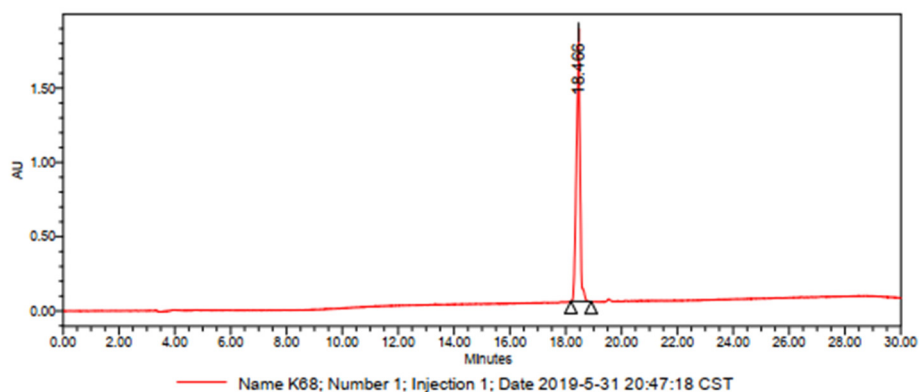

Channel: PDA 220.0 nm

|   | channel      | retention time(min) | area     | % area | peak height |
|---|--------------|---------------------|----------|--------|-------------|
| 1 | PDA 220.0 nm | 18.466              | 15471650 | 100.00 | 1833445     |

## 2.7. MS and HPLC data for Feleucin-K69

MS: expected mass: 1141.5; Measured average mass: 1140.8

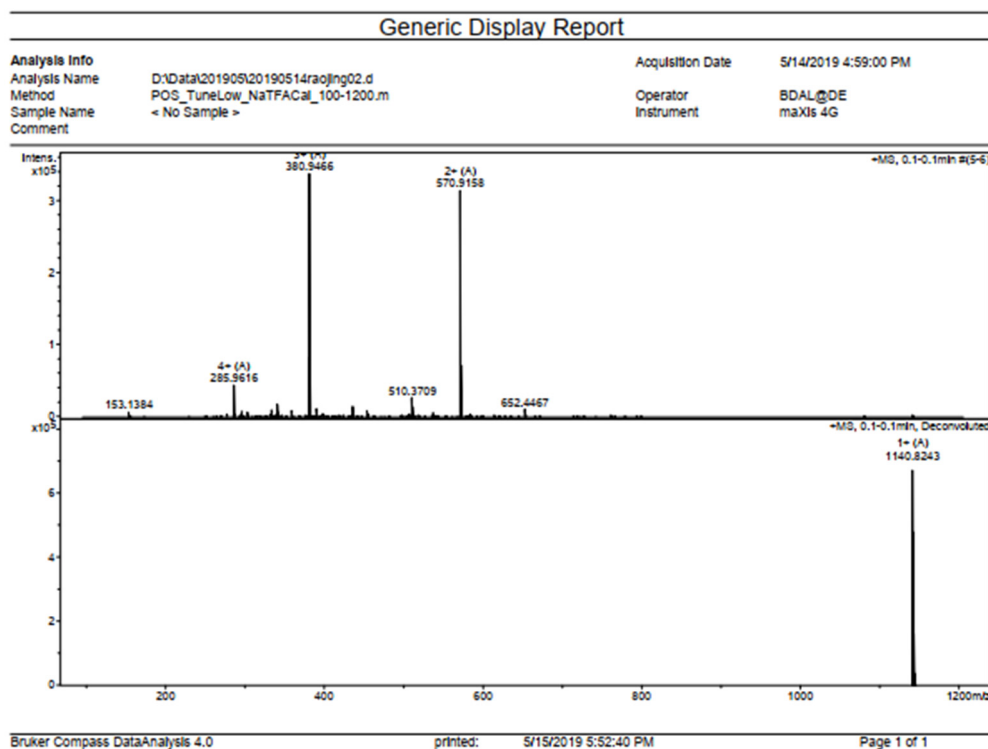

## Customer Peptide HPLC Report

Purity:100.00%

| Sample Information |              |                     |                        |
|--------------------|--------------|---------------------|------------------------|
| Name:              | K69          | Collector:          | System                 |
| Type:              | 未知           | Acquisition time:   | 2019-6-13 17:33:55 CST |
| Bottle number:     | 1            | Method group:       | peptide                |
| Injection times:   | 1            | Processing date:    | 2019-6-15 10:03:59 CST |
| Injection volume:  | 20.00 ul     | Processing method:  | 0                      |
| Operation time:    | 30.0 Minutes | Channel name:       | 220.0 nm               |
|                    |              | Channel annotation: | PDA 220.0 nm           |

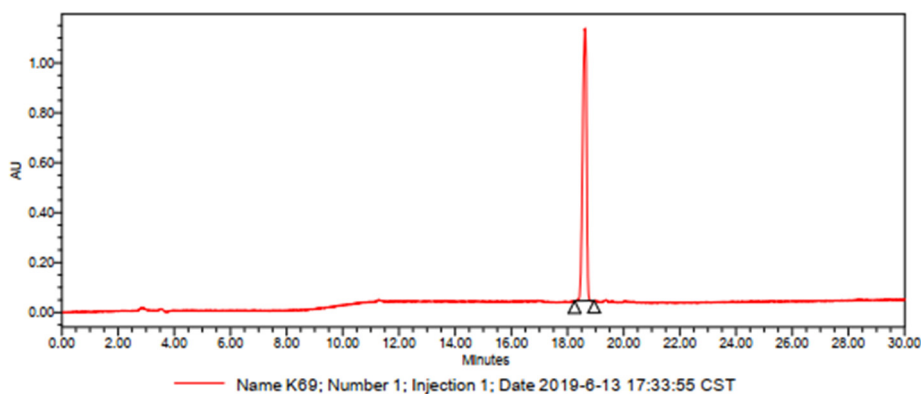

Channel: PDA 220.0 nm

|   | channel      | retention time(min) | area     | % area | peak height |
|---|--------------|---------------------|----------|--------|-------------|
| 1 | PDA 220.0 nm | 18.635              | 10688139 | 100.00 | 1089819     |



## 2.8. MS and HPLC data for Feleucin-K70

MS: expected mass: 1141.5; Measured average mass: 1140.8

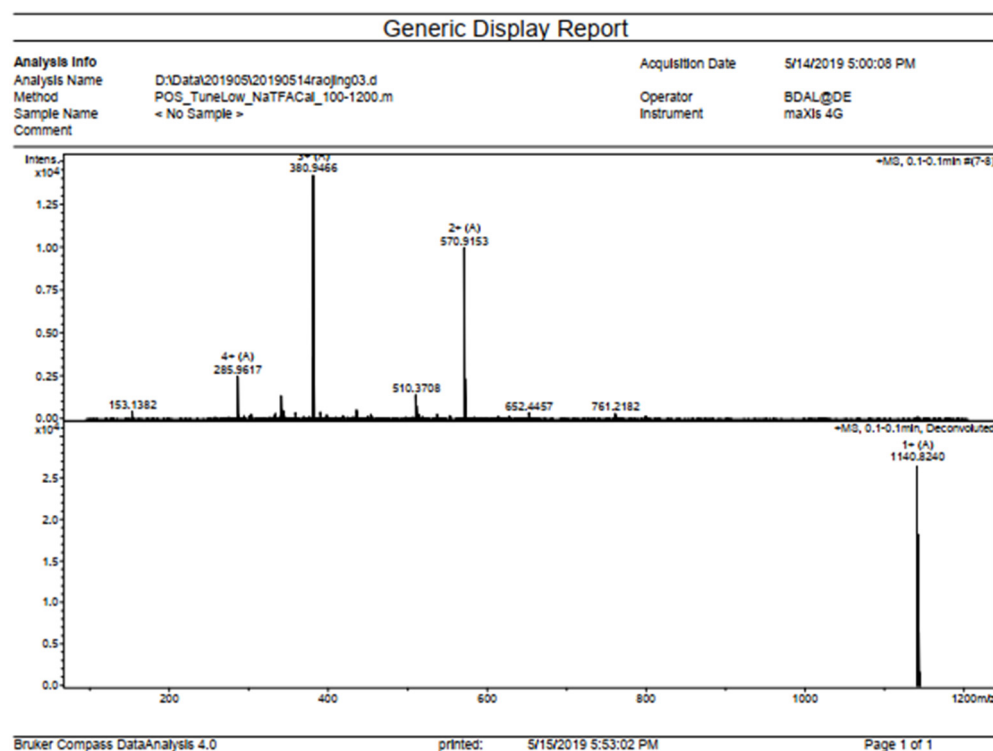

## Customer Peptide HPLC Report

Purity: 100.00%

| Sample Information |              |                     |                        |
|--------------------|--------------|---------------------|------------------------|
| Name:              | K70          | Collector:          | System                 |
| Type:              | NO           | Acquisition time:   | 2019-6-13 19:28:33 CST |
| Bottle number:     | 1            | Method group:       | peptide                |
| Injection times:   | 1            | Processing date:    | 2019-6-15 10:06:13 CST |
| Injection volume:  | 20.00 ul     | Processing method:  | 0                      |
| Operation time:    | 30.0 Minutes | Channel name:       | 220.0 nm               |
|                    |              | Channel annotation: | PDA 220.0 nm           |

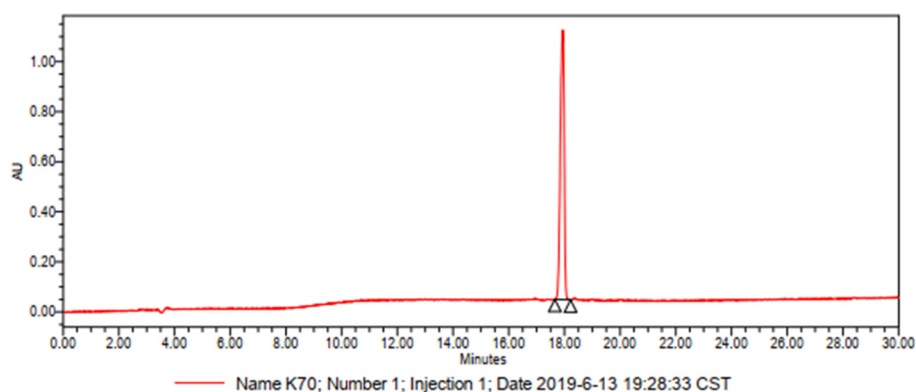

Channel: PDA 220.0 nm

|   | channel      | retention time(min) | area     | % area | peak height |
|---|--------------|---------------------|----------|--------|-------------|
| 1 | PDA 220.0 nm | 17.942              | 10441606 | 100.00 | 1077355     |

MS: expected mass: 1126.8; Measured average mass: 1125.8

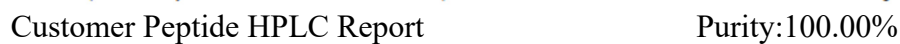

|                   |              |                     |                        |
|-------------------|--------------|---------------------|------------------------|
| Name:             | K71          | Collector:          | System                 |
| Type:             | NO           | Acquisition time:   | 2019-6-27 13:37:12 CST |
| Bottle number:    | 1            | Method group:       | peptide                |
| Injection times:  | 1            | Processing date:    | 2019-6-28 15:08:48 CST |
| Injection volume: | 20.00 ul     | Processing method:  | 0                      |
| Operation time:   | 30.0 Minutes | Channel name:       | 220.0 nm               |
|                   |              | Channel annotation: | PDA 220.0 nm           |

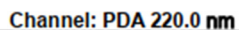

|   | channel      | retention<br>time(min) | area    | % area | peak<br>height |
|---|--------------|------------------------|---------|--------|----------------|
| 1 | PDA 220.0 nm | 20.493                 | 7843637 | 100.00 | 687935         |
